# Supplementary material for: Overexpression of AtMYB2 Promotes Tolerance to Salt Stress and Accumulations of Tanshinones and Phenolic Acid in Salvia miltiorrhiza
Source: MDPI journal article supplement (doi:10.3390/ijms25074111), 2024-04-08
Supplement: s1 [file s1]

## Supporting Information

Overexpression of *AtMYB2* promotes tolerance to salt stress and accumulations of tanshinones and phenolic acid in *Salvia miltiorrhiza*

**A: pCambia1301**

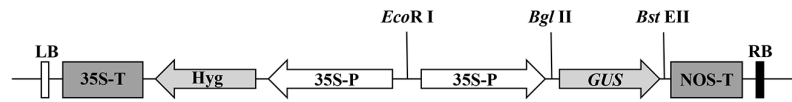

**B: p35S::AtMYB2**

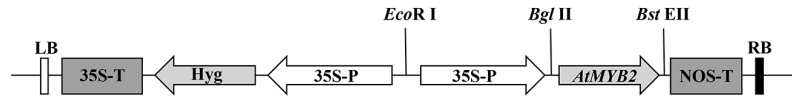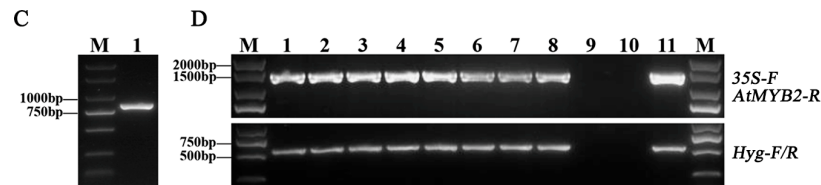

**Figure S1.** Construction of the *AtMYB2* overexpression vector. A: The schematic diagram of the T-DNA region structure in the pCambia1301 vector; B: The schematic diagram of the T-DNA region structure in the *pCambia1301-AtMYB2* overexpression vector; C: Amplification of the full-length CDS region of the *AtMYB2* gene, M, DL2000 Marker; D: PCR verification of *pCambia1301-AtMYB2* colonies, M, DL2000 Marker, lanes 1-8 represent positive colonies identified by PCR analysis, lane 9, negative control, lane 11, plasmid positive control.

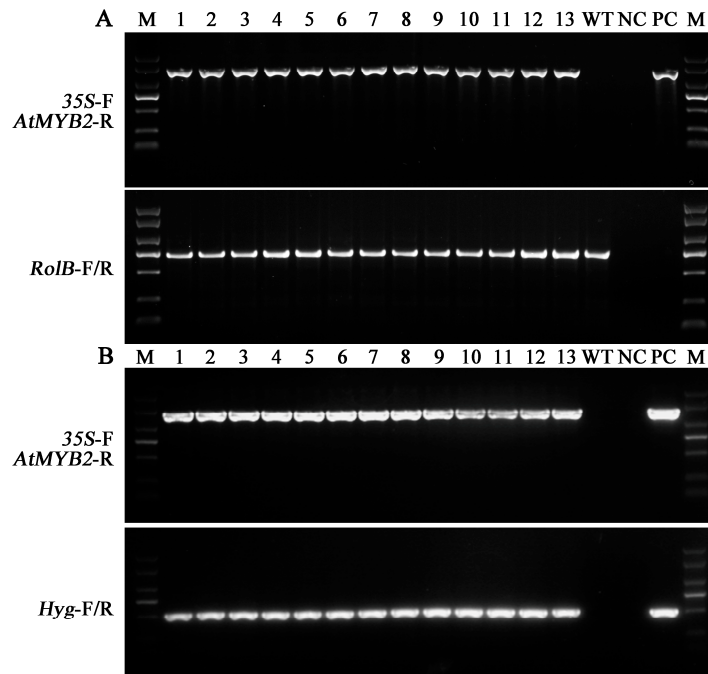

**Figure S2.** Identification of *AtMYB2* transgenic hairy roots and transgenic plants by PCR. *35S-F*, *AtMYB2-R* primers and *Hyg-F/R* primers were used to identify transgenic positive clones. The *rolB* gene was used to prove that the hairy roots were infected with *Agrobacterium*. WT, wild type; NC, negative control; PC, positive control; M, DL2000 DNA Marker.

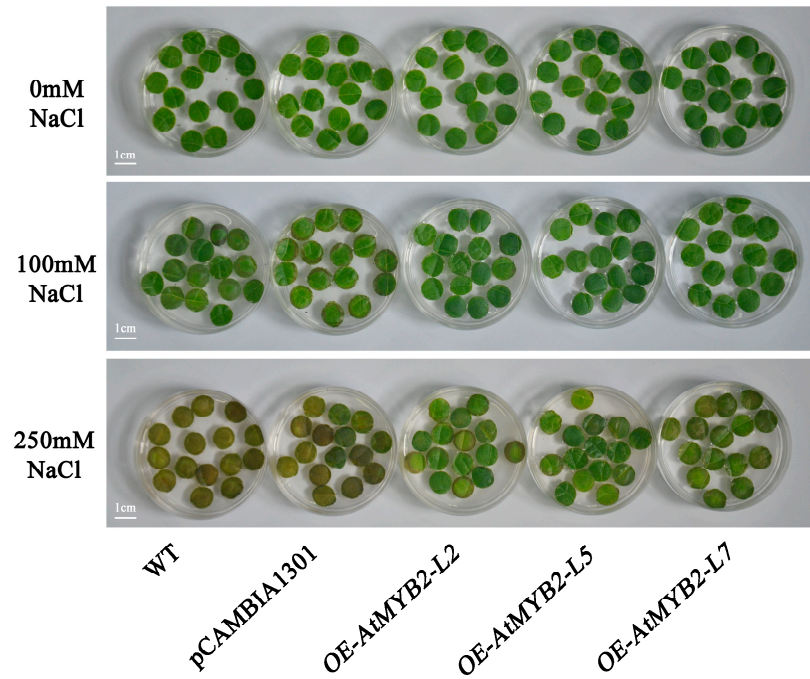

**Figure S3.** Phenotypic observation of detached leaf discs after treatment with 0 mM, 100 mM and 250 mM NaCl. WT, wild type; pCAMBIA1301, empty vector control pCAMBIA1301 line; *OE-AtMYB2-L2/L5/L7*, pCAMBIA1301-*AtMYB2* transgenic line 2/5/7. Images were taken at 4 DAT (days after treatment).

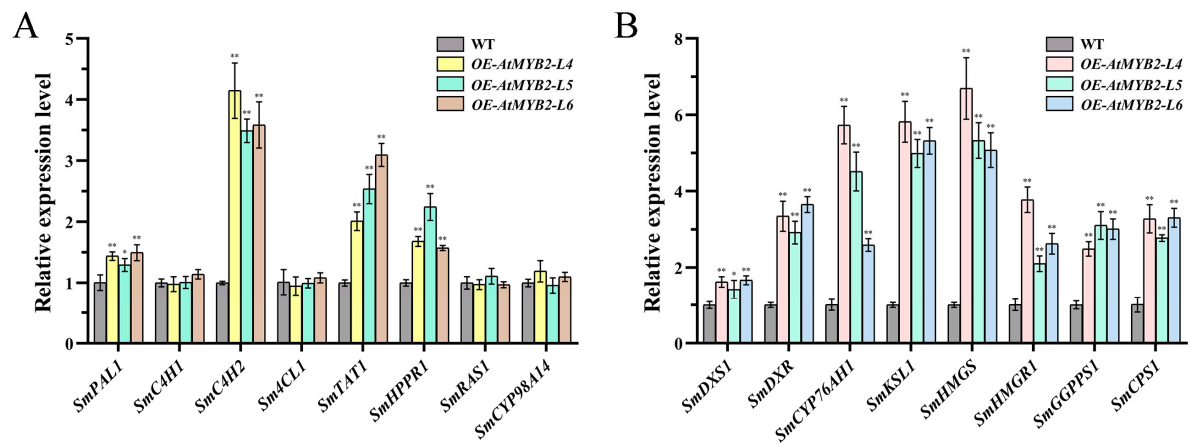

**Figure S4.** Transcript level of salvianolic acid biosynthesis pathway genes (A) and tanshinone biosynthesis pathway genes (B) in *S. miltiorrhiza* transgenic hairy roots. \* and \*\* represent significant differences at  $p < 0.05$  and  $p < 0.01$ .

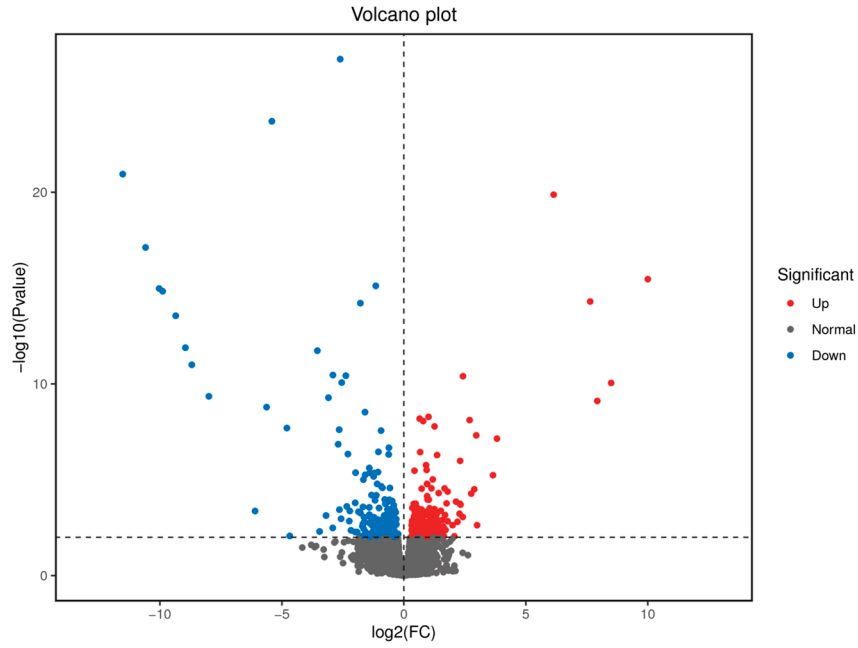

**Figure S5.** Volcano plot of DEGs of *AtMYB2* transgenic lines versus those of WT plants. Note: in the volcano plot, each dot represents a gene. X-axis:  $\log_2$  FC of expression; Y-axis:  $-\log_{10}$  (FDR) or  $-\log_{10}$  (P-value). Blue dots are down-regulated genes, while red dots are up-regulated ones and black dots are genes without significant differences.

**Table S1.** Statistics of sequencing data of *AtMYB2* transgenic *S. miltiorrhiza*.

| Samples | Clean reads | Clean bases   | GC Content | % $\geq$ Q30 |
|---------|-------------|---------------|------------|--------------|
| MYB2-1  | 20,579,033  | 6,139,823,990 | 49.86%     | 94.00%       |
| MYB2-2  | 25,998,774  | 7,769,656,646 | 50.00%     | 93.64%       |
| MYB2-3  | 24,657,193  | 7,364,060,990 | 49.19%     | 94.16%       |
| p1301-1 | 21,309,595  | 6,365,646,636 | 49.66%     | 93.63%       |
| p1301-2 | 25,825,132  | 7,717,456,100 | 49.38%     | 94.05%       |
| p1301-3 | 23,376,367  | 6,973,266,094 | 50.92%     | 94.28%       |

**Table S2.** Primers used in this study

| Primers              | Sequence (5' to 3')                                     |
|----------------------|---------------------------------------------------------|
| <i>AtMYB2-F</i>      | ACTCTTGACCATGGT <u>AGATCT</u> ATGGAAGATTACGAGCGAATAA    |
| <i>AtMYB2-R</i>      | GGGGAAATTCGAGCT <u>GGTCACCT</u> TAAATTATACGAATACGATGTCG |
| <i>35S-F</i>         | AACAGAACTCGCCGTAAAG                                     |
| <i>Hyg-F</i>         | TACACAGCCATCGGTCCAGACG                                  |
| <i>Hyg-R</i>         | TCGGTCAATACACTACATGGCG                                  |
| <i>rolB-F</i>        | GCTCTTGCAGTGCTAGATTT                                    |
| <i>rolB-R</i>        | GAAGGTGCAAGCTACCTCTC                                    |
| <i>q-AtMYB2-F</i>    | CGAATCAACGCCCAATCATTACC                                 |
| <i>q-AtMYB2-R</i>    | ATCATAACCTGACCCGTTACCA                                  |
| <i>SmPAL1-QF</i>     | ACCCCGTCACCAACCACGTGCAGAG                               |
| <i>SmPAL1-QR</i>     | CGCCCATTTGTGAGAGTTTCGTTT                                |
| <i>SmPAL2-QF</i>     | CAGGATCAAGGGGAGCAGATCGTAT                               |
| <i>SmPAL2-QR</i>     | CACCATTCCATTCCCTGAGACAG                                 |
| <i>SmPAL3-QF</i>     | CGAGCTCGAGGTGCTCCTC                                     |
| <i>SmPAL3-QR</i>     | CGGCTCTCCATTCCACGATTC                                   |
| <i>SmC4H1-QF</i>     | CCAGGAGTCCAAATAACAGAGC                                  |
| <i>SmC4H1-QR</i>     | GCCACCAAGCGTTCACCAAGAT                                  |
| <i>SmC4H2-QF</i>     | TGGACCATTGCGGAACTCATC                                   |
| <i>SmC4H2-QR</i>     | ATGGAACCACCATTCTACGACG                                  |
| <i>Sm4CL1-QF</i>     | ATTCGCATTTCGCATTTCTCGG                                  |
| <i>Sm4CL1-QR</i>     | GCGGCGTAGTGCTTCACCTTT                                   |
| <i>Sm4CL2-QF</i>     | AGCTCTTCATCGTGGACCGA                                    |
| <i>Sm4CL2-QR</i>     | CACGACGAAAGCAACTGGGA                                    |
| <i>Sm4CL3-QF</i>     | GTCGACGCGGACAACCCTAA                                    |
| <i>Sm4CL3-QR</i>     | AGCAGCGAGCCGATCTCAA                                     |
| <i>SmTAT1-QF</i>     | CAACTGCTGGTCTTCCACAAAC                                  |
| <i>SmTAT1-QR</i>     | GCGAGCCAAAACGGACA                                       |
| <i>SmTAT2-QF</i>     | CGCTGACCCAGCAACCTTTAT                                   |
| <i>SmTAT2-QR</i>     | TGTCATCCTCAATGCCTTCG                                    |
| <i>SmHPPR1-QF</i>    | TGACTCCAGAAACAACCCACATT                                 |
| <i>SmHPPR1-QR</i>    | CCCAGACGACCCTTCACAAG                                    |
| <i>SmHPPR2-QF</i>    | AATGTGGGAGTGATGATGACCAC                                 |
| <i>SmHPPR2-QR</i>    | GCTTGAAGAGTGTGAAGCGC                                    |
| <i>SmHPPR3-QF</i>    | GCGCTACCGCTCCTTGAGAT                                    |
| <i>SmHPPR3-QR</i>    | CACAAATCCGCCGCGAAGTC                                    |
| <i>SmRAS1-QF</i>     | CGAGATCGCCTACTCCAAGTTCAAG                               |
| <i>SmRAS1-QR</i>     | AGATGGCGTTACCGAAGTATCCCTG                               |
| <i>SmRAS-Like-QF</i> | ACCTTGAGTCTAAGCCTGCGTG                                  |
| <i>SmRAS-Like-QR</i> | CGTCACCCAACTCGTTATCCC                                   |
| <i>SmCYP98A14-QF</i> | GGTCTGTACCGTCGTCCTCTTCTCC                               |
| <i>SmCYP98A14-QR</i> | CCTTTTCCCAAATACCAGCCTTGT                                |
| <i>SmDXS1-QF</i>     | GGAAGAAGAGACAGGATGCCGAGTT                               |

---

|                      |                             |
|----------------------|-----------------------------|
| <i>SmDXS1-QR</i>     | AGTCCAGGTAGCCAGCATTGTTTCAT  |
| <i>SmDXR-QF</i>      | CGACGAGAAAATCGGATACCTGG     |
| <i>SmDXR-QR</i>      | CATACAAGAGCAGGACTCAAACCG    |
| <i>SmMCT-QF</i>      | AGGTTCTGAAGGATGGCAAGCGAAT   |
| <i>SmMCT-QR</i>      | CCATAGCGTCTTCCTGTCCAGTGTT   |
| <i>SmCMK-QF</i>      | TACACCAACGCCACTCTTCCTCAA    |
| <i>SmCMK-QR</i>      | GCCGTCGCTCTGATAAGATGGATTG   |
| <i>SmMDS-QF</i>      | GAGCACGGTTGGAGCAGAGACT      |
| <i>SmMDS-QR</i>      | TGAGGAATATTGATGCCGCCGATAATG |
| <i>SmHDS1-QF</i>     | GTTTGGTAGTCTCTTTGCGTG GTG   |
| <i>SmHDS1-QR</i>     | AACTGGGAAGTCGAGCGAGTTCTC    |
| <i>SmHDR-QF</i>      | TGAAGCTAGAAGACAGTTCCCCTC    |
| <i>SmHDR-QR</i>      | GTATTCCAAACCTTAGACACCCATG   |
| <i>SmIDI-QF</i>      | GCAACGATCCACAATAAGGT        |
| <i>SmIDI-QR</i>      | ATGCCGAGTTCATCCAACAG        |
| <i>SmGPPS-QF</i>     | CACTTTCGCAATCCTATTCAGTC     |
| <i>SmGPPS-QR</i>     | GGGAACCTCCGCAACTACCAT       |
| <i>SmGGPPS-QF</i>    | AGGTGGAAGCAGCGATCAAAT       |
| <i>SmGGPPS-QR</i>    | CCAGCCGTCTTTCCCAACTC        |
| <i>SmCPS1-QF</i>     | GATCGCCTCGTCAATACCAT        |
| <i>SmCPS1-QR</i>     | TTCGAACCCACAAGTCATGT        |
| <i>SmKSL1-QF</i>     | GTGTGACCCTTCTGCTAGCA        |
| <i>SmKSL1-QR</i>     | TGCATTGTCTTG GGAAGATG       |
| <i>SmCYP76AH1-QF</i> | TCCATCTCGGCAGCCTCTACAC      |
| <i>SmCYP76AH1-QR</i> | GAGAAGACCTGCCCCGTGCCT       |
| <i>SmAACT1-QF</i>    | GGAGAGGACGACCATCCACCATTG    |
| <i>SmAACT1-QR</i>    | GGCATGAGCGGCATCAGCATATCC    |
| <i>SmHMGR1-QF</i>    | TCGTTTTCAATAAGTCGAGTAGA     |
| <i>SmHMGR1-QR</i>    | ATTCTGAAGGAAGTCCAAAACAT     |
| <i>SmHMGS-QF</i>     | GATGAGCATGACAGCGGTTACTT     |
| <i>SmHMGS-QR</i>     | GGATTTGCTCTTGTCGAGTACGGT    |
| <i>SmMK-QF</i>       | CTGGGATAGACAATACAGTAAGCAC   |
| <i>SmMK-QR</i>       | ACGAGCATCTTCAAAGGCATA       |
| <i>SmPMK-QF</i>      | GCTTGCCATTGACCTCGGAATCT     |
| <i>SmPMK-QR</i>      | ACCACTGAACTCTGAAGGAAGACTGA  |
| <i>SmMDC-QF</i>      | AAGCACTGGGATGACCTCGTTAT     |
| <i>SmMDC-QR</i>      | ATGGAACTGATTACTATCGGCACAAG  |
| <i>SmFPPS-QF</i>     | GTGGACTGATGGTTCTCGTCAATGG   |
| <i>SmFPPS-QR</i>     | CACACCAGCCAAGAGCACTAGC      |
| <i>SmActin-QF</i>    | AGCACCGAGCAGCATGAAGATT      |
| <i>SmActin-QR</i>    | AGCAAAGCAGCGAACGAAGAGT      |

---
